# Supplementary material for: Effects of post-stress corticosterone on hippocampal excitability and behavior involving hyperpolarization-activated cation channel 1 function
Source: Research Square preprint supplement (doi:10.21203/rs.3.rs-7014211/v1), 2025-07-11
Supplement: Supplementary file 1 [file 4881acbfca8f53a7efa3ec62.docx]

***Supplemental Information***

**Effects of post-stress corticosterone on hippocampal excitability and behavior involving hyperpolarization-activated cation channel 1 function**

Table S1. Summary of statistical analyses.

| **Figure** | **Statistical Tests** | **Comparison** | **H or F or W or U value** | **P value** |
| --- | --- | --- | --- | --- |
| Fig 1G | Kruskal-Wallis test | group | H (3,36)=16.45 | 0.0009 |
|  | Post-hoc | Con-Veh  vs.  SPS-CORT | n/a | 0.0004 |
| Fig 1H | Kruskal-Wallis test | group | H (3,36)=8.318 | 0.0399 |
|  | Post-hoc | Con-Veh  vs.  SPS-CORT | n/a | 0.0465 |
| Fig 2C | Wilcoxon matched-pairs signed rank test | Con-Veh  Before vs After | W=45 | 0.0039 |
|  | Wilcoxon matched-pairs signed rank test | Con-CORT  Before vs After | W=45 | 0.0039 |
|  | Wilcoxon matched-pairs signed rank test | SPS-Veh  Before vs After | W=45 | 0.0039 |
|  | Wilcoxon matched-pairs signed rank test | SPS-CORT  Before vs After | W=45 | 0.0039 |
| Fig 2F | Two-way ANOVA | Interaction | F (6,96)=0.2970 | 0.9370 |
|  |  | Time | F (2,96)=11.62 | <0.0001 |
|  |  | Group | F (3,96)=12.59 | <0.0001 |
| Fig 2G | Kruskal-Wallis test | group | H (3,36)=12.56 | 0.0057 |
|  | Post-hoc | Con-Veh  vs.  SPS-CORT | n/a | 0.0157 |
|  | Post-hoc | Con-CORT  vs.  SPS-CORT | n/a | 0.0108 |
| Fig 2I | Kruskal-Wallis test | Control-Veh | H (2,27)=13.14 | 0.0014 |
|  | Post-hoc | D1 vs. D2 | n/a | 0.1721 |
|  | Post-hoc | D1 vs. D3 | n/a | 0.0009 |
|  | Post-hoc | D2 vs. D3 | n/a | 0.2550 |
| Fig 2I | Kruskal-Wallis test | Control-CORT | H (2,27)=8.697 | 0.0129 |
|  | Post-hoc | D1 vs. D2 | n/a | 0.1257 |
|  | Post-hoc | D1 vs. D3 | n/a | 0.0125 |
|  | Post-hoc | D2 vs. D3 | n/a | >0.9999 |
| Fig 2I | Kruskal-Wallis test | SPS-Veh | H (2,27)=11.98 | 0.0025 |
|  | Post-hoc | D1 vs. D2 | n/a | 0.8551 |
|  | Post-hoc | D1 vs. D3 | n/a | 0.0021 |
|  | Post-hoc | D2 vs. D3 | n/a | 0.0616 |
| Fig 3D | Kruskal-Wallis test | Rin at RMP | H (3,47)=14.81 | 0.002 |
|  | Post-hoc | Con-Veh  vs.  SPS-CORT | n/a | 0.0183 |
|  | Post-hoc | Con-CORT  vs.  SPS-CORT | n/a | 0.0051 |
|  | Post-hoc | SPS-Veh  vs.  SPS-CORT | n/a | 0.0138 |
| Fig 3E | Kruskal-Wallis test | Rin at -65 mV | H (3,47)=11.52 | 0.0092 |
|  | Post-hoc | Con-Veh  vs.  SPS-CORT | n/a | 0.0294 |
|  | Post-hoc | Con-CORT  vs.  SPS-CORT | n/a | 0.0404 |
|  | Post-hoc | SPS-Veh  vs.  SPS-CORT | n/a | 0.0353 |
| Fig 3G | Two-way ANOVA | Interaction | F (27,360)=0.7333 | 0.8334 |
|  |  | pA | F (9,360)=108.4 | <0.0001 |
|  |  | Group | F (3,360)=42.28 | <0.0001 |
| Fig 3H | Two-way ANOVA | Interaction | F (27,360)=0.9616 | 0.5225 |
|  |  | pA | F (9,360)=101.2 | <0.0001 |
|  |  | Group | F (3,360)=42.53 | <0.0001 |
| Fig 4B | Two-way ANOVA | Interaction | F (8,126)=6.911 | <0.0001 |
|  |  | Vm | F (8,126)=45.88 | <0.0001 |
|  |  | Group | F (1,126)=105.3 | <0.0001 |
| Fig 4D | Unpaired t Test | V1/2:  SPS-Veh  vs.  SPS-CORT | t(13)=2.267  95% Confidential interval [0.388, 15.87]  R2=0.2833 | 0.0411 |
| Fig 4H | Wilcoxon matched-pairs signed rank test | SPS-Veh  Before vs After | W=-21 | 0.0312 |
|  | Wilcoxon matched-pairs signed rank test | SPS-CORT  Before vs After | W=-21 | 0.0312 |
| Fig 4I | Wilcoxon matched-pairs signed rank test | SPS-Veh  Before vs After | W=21 | 0.0312 |
|  | Wilcoxon matched-pairs signed rank test | SPS-CORT  Before vs After | W=21 | 0.0312 |
| Fig 4I | Mann-Whitney Test | SPS-Veh (Baseline)  Vs.  SPS-CORT (Baseline) | U=2  Difference:  Actual=-20.04  Difference:  Hodges-Lehmann=  -28.99 | 0.0087 |
| Fig 5D | Kruskal-Wallis test | Center Entries | H (2,25)=7.704 | 0.0212 |
|  | Post-hoc | Con vs. SPS+GFP | n/a | >0.9999 |
|  | Post-hoc | Con vs. SPS+HCN1 | n/a | 0.0200 |
|  | Post-hoc | SPS+GFP  vs.  SPS+HCN1 | n/a | 0.1352 |
| Fig 5F | Kruskal-Wallis test | SAP (%) | H (2,25)=10.8 | 0.0045 |
|  | Post-hoc | Con vs. SPS+GFP | n/a | >0.9999 |
|  | Post-hoc | Con vs. SPS+HCN1 | n/a | 0.041 |
|  | Post-hoc | SPS+GFP  vs.  SPS+HCN1 | n/a | 0.0494 |
| Fig 5I | Wilcoxon matched-pairs signed rank test | Control  Before vs After | W=45 | 0.0039 |
|  | Wilcoxon matched-pairs signed rank test | SPS+GFP  Before vs After | W=36 | 0.0078 |
|  | Wilcoxon matched-pairs signed rank test | SPS+HCN1  Before vs After | W=28 | 0.0156 |
| Fig 5J | Two-way ANOVA | Interaction | F (4,66)=0.9028 | 0.4675 |
|  |  | Time | F (2,66)=22.60 | <0.0001 |
|  |  | Group | F (2,66)=13.74 | <0.0001 |
| Fig 5L | Two-way ANOVA | Interaction | F (4,66)=0.8116 | 0.5223 |
|  |  | Time | F (2,66)=8.979 | 0.0004 |
|  |  | Group | F (2,66)=14.97 | <0.0001 |
| Fig 5M | Kruskal-Wallis test | Total Freezing (%) | H (2,25)=8.200 | 0.0166 |
|  | Post-hoc | Con vs. SPS+GFP | n/a | >0.9999 |
|  | Post-hoc | Con vs. SPS+HCN1 | n/a | 0.0453 |
|  | Post-hoc | SPS+GFP  vs.  SPS+HCN1 | n/a | 0.0267 |
| Fig 5N | Kruskal-Wallis test | Control group | H (2,30)=8.632 | 0.0134 |
|  | Post-hoc | D1 vs. D2 | n/a | 0.5470 |
|  | Post-hoc | D1 vs. D3 | n/a | 0.010 |
|  | Post-hoc | D2 vs. D3 | n/a | 0.3285 |
| Fig 5N | Kruskal-Wallis test | SPS+GFP | H (2,24)=14.37 | 0.0008 |
|  | Post-hoc | D1 vs. D2 | n/a | >0.9999 |
|  | Post-hoc | D1 vs. D3 | n/a | 0.0011 |
|  | Post-hoc | D2 vs. D3 | n/a | 0.0106 |
| Fig 6C | Kruskal-Wallis test | Vm | H (2,36)=11.67 | 0.0029 |
|  | Post-hoc | Con vs. SPS+GFP | n/a | >0.9999 |
|  | Post-hoc | Con vs. SPS+HCN1 | n/a | 0.0071 |
|  | Post-hoc | SPS+GFP  vs.  SPS+HCN1 | n/a | 0.0064 |
| Fig 6D | Kruskal-Wallis test | Rin at RMP | H (2,36)=20.24 | <0.0001 |
|  | Post-hoc | Con vs. SPS+GFP | n/a | >0.9999 |
|  | Post-hoc | Con vs. SPS+HCN1 | n/a | <0.0001 |
|  | Post-hoc | SPS+GFP  vs.  SPS+HCN1 | n/a | 0.0007 |
| Fig 6E | Kruskal-Wallis test | Rin at -65 mV | H (2,36)=20.29 | <0.0001 |
|  | Post-hoc | Con vs. SPS+GFP | n/a | >0.9999 |
|  | Post-hoc | Con vs. SPS+HCN1 | n/a | <0.0001 |
|  | Post-hoc | SPS+GFP  vs.  SPS+HCN1 | n/a | 0.0007 |
| Fig 6G | Two-way ANOVA | Interaction | F (18,290)=2.668 | 0.0003 |
|  |  | pA | F (9,290)=58.55 | <0.0001 |
|  |  | Group | F (2,290)=90.39 | <0.0001 |
| Fig 6H | Two-way ANOVA | Interaction | F (18,300)=7.348 | <0.0001 |
|  |  | pA | F (9,300)=43.97 | <0.0001 |
|  |  | Group | F (2,300)=193.2 | <0.0001 |
| Fig 6J | Two-way ANOVA | Interaction | F (16,135)=2.825 | 0.0006 |
|  |  | Vm | F (8,135)=13.27 | <0.0001 |
|  |  | Group | F (2,135)=51.45 | <0.0001 |
| Fig 6L | One-Way ANOVA | V1/2 | F (2,16)=16.29  R2=0.6707 | 0.0001 |
